# Supplementary material
Source: PubMed Central journal article supplement (PMC169886)
Supplement: nar_31_15_4385__1.pdf [file nar_31_15_4385__1.pdf]

## SUPPLEMENTARY MATERIAL

**Table S1. Chimeric retrotranscripts of the human genome found in this study.**

| <b>N<sup>a</sup></b> | <b>Genome location<sup>b</sup></b> | <b>GenBank<sup>c</sup></b> | <b>5'-part<sup>d</sup></b> | <b>5'-part div.<sup>e</sup>, %</b> | <b>3'-part<sup>f</sup></b> | <b>3'-part div.<sup>g</sup>, %</b> |
|----------------------|------------------------------------|----------------------------|----------------------------|------------------------------------|----------------------------|------------------------------------|
| 1                    | 10p13                              | AL138764                   | U6                         | 0                                  | L1Hs                       | 1,3                                |
| 2                    | Xq27                               | Z98950                     | U6                         | 0                                  | L1Hs                       | 1,1                                |
| 3                    | 4p14                               | AC018858                   | U6                         | 0,9                                | L1PA2                      | 1,2                                |
| 4                    | 12q23                              | AC091950                   | U6                         | 0,9                                | L1PA2                      | 4,1                                |
| 5                    | 10p13                              | AC073586                   | U6                         | 1,9                                | L1PA2                      | 1,2                                |
| 6                    | 18q22                              | AP001402                   | U6                         | 1,9                                | L1PA2                      | 1,8                                |
| 7                    | 3q29                               | AC069244                   | U6                         | 2,8                                | L1PA2                      | 0,8                                |
| 8                    | 8p12                               | AC087671                   | U6                         | 3,7                                | L1PA2                      | 2,5                                |
| 9                    | 15q22                              | AC011846                   | U6                         | 3,7                                | L1PA2                      | 1,3                                |
| 10                   | 11q13                              | AP003716                   | U6                         | 4,7                                | L1PA2                      | 2,7                                |
| 11                   | 2q31                               | AC010894                   | U6                         | 0                                  | L1PA3                      | 0,8                                |
| 12                   | 8q24                               | AC023487                   | U6                         | 0,9                                | L1PA3                      | 1,4                                |
| 13                   | 8q12                               | AC032027                   | U6                         | 0,9                                | L1PA3                      | 1,2                                |
| 14                   | 15q13                              | AC021413                   | U6                         | 0,9                                | L1PA3                      | 2,7                                |
| 15                   | 5q21                               | AC010228                   | U6                         | 5,6                                | L1PA3                      | 2,4                                |
| 16                   | 16q23                              | AC090551                   | U6                         | 4,7                                | L1PA3                      | 3,5                                |
| 17                   | 8q11                               | AC091163                   | U6                         | 7,6                                | L1PA4                      | 4,7                                |
| 18                   | 1q25                               | AL358434                   | U6                         | 2,7                                | L1PA4                      | 2,7                                |
| 19                   | 5q34                               | AC091996                   | U6                         | 5,3                                | L1PA4                      | 3,2                                |
| 20                   | 4q25                               | AC004050                   | U6                         | 3,7                                | L1PA5                      | 4,3                                |
| 21                   | 1p35                               | AL358132                   | U6                         | 3,7                                | L1PA5                      | 3,5                                |
| 22                   | 3q12                               | AC016962                   | U6                         | 5,6                                | L1PA5                      | 3,8                                |
| 23                   | 4q21                               | AP002859                   | U6                         | 6,5                                | L1PA5                      | 4,2                                |
| 24                   | 13q21                              | AL356754                   | U6                         | 8,4                                | L1PA5                      | 3,6                                |
| 25                   | 2q33                               | AC005037                   | U6                         | 2,8                                | L1PA5                      | 5,3                                |
| 26                   | Xp11                               | AL121578                   | U6                         | 5,6                                | L1PA5                      | 2,4                                |
| 27                   | 3q26                               | AC007849                   | U6                         | 6,5                                | L1PA6                      | 5,5                                |
| 28                   | Xq22                               | AL121883                   | U6                         | 3,7                                | L1PA7                      | 7,8                                |
| 29                   | 11q23                              | AC067833                   | U6                         | 4,7                                | L1PA7                      | 5,4                                |
| 30                   | 6p22                               | AL591416                   | U6                         | 5,6                                | L1PA7                      | 8,4                                |
| 31                   | 7q22                               | AC023954                   | U6                         | 5,6                                | L1PA7                      | 7,8                                |
| 32                   | Xp11                               | Z92545                     | U6                         | 7,4                                | L1PA7                      | 5,0                                |

|    |       |          |    |      |                                                     |      |
|----|-------|----------|----|------|-----------------------------------------------------|------|
| 33 | 14q32 | AL117209 | U6 | 7,4  | L1PA7                                               | 5,2  |
| 34 | 1q42  | AL139161 | U6 | 7,5  | L1PA7                                               | 5,4  |
| 35 | 8q22  | AC012213 | U6 | 6,5  | L1PA7                                               | 7,1  |
| 36 | 1p34  | AL445669 | U6 | 7,5  | L1PA7                                               | 4,6  |
| 37 | 1p22  | AL136381 | U6 | 10,3 | L1PA7                                               | 10,7 |
| 38 | 10q25 | AC026226 | U6 | 8,4  | L1PA7                                               | 6,6  |
| 39 | 11q25 | AP000912 | U6 | 2,4  | L1PA7                                               | 4,0  |
| 40 | 13q22 | AL157361 | U6 | 5,6  | L1PA8                                               | 19,2 |
| 41 | 5q11  | AC091866 | U6 | 6,5  | L1PA8                                               | 0    |
| 42 | 18p21 | AC007628 | U6 | 7,5  | L1PA8                                               | 7,2  |
| 43 | 4q34  | AC084353 | U6 | 11,0 | L1PA8                                               | 5,5  |
| 44 | Xp21  | AL590065 | U6 | 10,5 | L1PA8                                               | 5,1  |
| 45 | 18q21 | AC025660 | U6 | 4,6  | L1PA10                                              | 7,7  |
| 46 | Xq23  | AL034411 | U6 | 7,5  | L1PA10                                              | 9,0  |
| 47 | Xq22  | AL035427 | U6 | 9,5  | L1PA10                                              | 12,2 |
| 48 | 13q14 | AL161421 | U6 | 8,4  | L1PA12                                              | 11,7 |
| 49 | 22q12 | AL096702 | U6 | 9,5  | L1PA13                                              | 11,0 |
| 50 | 5q34  | AC091907 | U6 | 11,2 | L1PA14                                              | 14,3 |
| 51 | 1q43  | AC068598 | U6 | 11,7 | L1PA14                                              | 10,0 |
| 52 | 2q33  | AC009409 | U6 | 10,4 | L1PA15                                              | 15,0 |
| 53 | 16q22 | AC012184 | U6 | 7,4  | L1MB3                                               | 15,3 |
| 54 | 8q22  | AP003355 | U6 | 9,3  | L1MA1                                               | 8,3  |
| 55 | 10q22 | AL359074 | U6 | 14,9 | L1MA9                                               | 18,6 |
| 56 | 2p16  | AC007006 | U6 | 15,9 | L1MA9                                               | 19,4 |
| 57 | 7q21  | AC004128 | U6 | 2,8  | AluY                                                | 5,4  |
| 58 | 16q13 | AC009128 | U6 | 4,6  | AluSg                                               | 11,0 |
| 59 | 19q13 | AC022144 | U6 | 7,4  | AluSg                                               | 9,3  |
| 60 | 6p21  | AL513008 | U6 | 5,6  | Alu                                                 | 7,4  |
| 61 | 10p23 | AC021037 | U6 | 5,6  | mRNA for<br>Nonhistone<br>Chromosomal<br>Protein 14 | 7,1  |
| 62 | 16q22 | AC009131 | U6 | 4,6  | mRNA for<br>Keratin 18                              | 3,0  |
| 63 | 1p35  | AL591050 | U6 | 3,7  | mRNA for<br>Gamma Actin 1                           | 9,8  |
| 64 | 9q31  | AL359552 | U6 | 7,5  | mRNA for<br>Laminin<br>Receptor 1                   | 5,1  |

|    |       |          |         |      |                                                              |      |
|----|-------|----------|---------|------|--------------------------------------------------------------|------|
| 65 | 13q31 | AL354668 | U6      | 7,5  | mRNA T41250                                                  | 13,5 |
| 66 | 8p22  | AC084085 | U6      | 6,5  | mRNA<br>AB062435                                             | 5,0  |
| 67 | 9q22  | AL353748 | U3      | 4,3  | L1PA5                                                        | 3,7  |
| 68 | 19q13 | AL158034 | U3      | 1,4  | L1PA2                                                        | 1,4  |
| 69 | 3q27  | AC069417 | U3      | 5,6  | L1PA3                                                        | 2,3  |
| 70 | 2q24  | AC009967 | U3      | 7,0  | L1PA6                                                        | 8,0  |
| 71 | 3q13  | AC060225 | U3      | 5,2  | L1PA7                                                        | 7,3  |
| 72 | 8q22  | AP004289 | U3      | 3,0  | L1PA2                                                        | 1,6  |
| 73 | 13q21 | AL590102 | U3      | 5,4  | L1PA7                                                        | 7,8  |
| 74 | 17p11 | AC005410 | U3      | 8,6  | mRNA for<br>Ribosome<br>Associated<br>Membrane<br>Protein 14 | 7,3  |
| 75 | 10q25 | AL138766 | U5      | 8,9  | L1PA7                                                        | 7,3  |
| 76 | 5q11  | AC016632 | 5S rRNA | 9,4  | L1PA10                                                       | 9,2  |
| 77 | Xq13  | AL158069 | 5S rRNA | 4,1  | AluY                                                         | 6,1  |
| 78 | 12q23 | AC089983 | 5S rRNA | 0    | AluSq                                                        | 9,2  |
| 79 | 20q13 | AL162615 | 7SL RNA | 14,9 | AluSq                                                        | 12,4 |
| 80 | 2q36  | AC016712 | AluSx   | 8,5  | mRNA for<br>Ribosome<br>Protein L31                          | 5,0  |
| 81 | 12q13 | AC010892 | AluJo   | 13,0 | mRNA for<br>Ribosome<br>Protein L31                          | 9,6  |

<sup>a</sup> retrotranscript serial number; <sup>b</sup> location in the human genome found with the Draft Human Genome Browser; <sup>c</sup> GenBank accession number; <sup>d</sup> chimera's 5'-part; <sup>e</sup> divergence of the chimera's 5'-part from the corresponding consensus sequence, %; <sup>f</sup> chimera's 3'- part; <sup>g</sup> divergence of the chimera's 3'- part from the corresponding consensus sequence.

**Table S2. Genomic primer sets used for PCR amplification.**

| Name                                                    | Sequence (5'-3')           | Accession <sup>a</sup> |
|---------------------------------------------------------|----------------------------|------------------------|
| <i>Primer pairs used for locus-specific PCRs</i>        |                            |                        |
| 1G1                                                     | gagtacctgctgtgtatgagcc     | AL158069               |
| 1G2                                                     | acctctgaactcactatgatgatg   |                        |
| 2G1                                                     | tggcttgtagtagagaggctacc    | AC060225               |
| 2G2                                                     | tggctgaagaaggattggtc       |                        |
| 3G1                                                     | gaatgtctgt aacacctgtggc    | AC005410               |
| 3G2                                                     | cctagcctgcttatctccg        |                        |
| 4G1                                                     | gtgatagacactgtaagcagagaag  | AC069417               |
| 4G2                                                     | agctgtgaagtcagacttcc       |                        |
| 5G1                                                     | agtcgctgaagtaagcctctg      | AP004289               |
| 5G2                                                     | gggatcttgtcttagctatgcc     |                        |
| 6G1                                                     | ttacctgccactcagagatcac     | AC010894               |
| 6G2                                                     | ttaagtctgagtttagcttctc     |                        |
| 7G1                                                     | aatgaaatctatgacaacagtagtac | AC021034               |
| 7G2                                                     | gcttaatgattatggctgtgac     |                        |
| 8G1                                                     | tatactgatcttagattccacaacc  | Z98950                 |
| 8G2                                                     | cagaatggataacatatccatagc   |                        |
| 9G1                                                     | ctagctggccgtaacagag        | AL359552               |
| 9G2                                                     | ggaagcttagaggaaatcaagatg   |                        |
| 10G1                                                    | tggactaccttctattcaggacc    | AL591050               |
| 10G2                                                    | gtatagtgatgattgcagagctagg  |                        |
| 11G1                                                    | ctaggcggatagtcttgagg       | AC009131               |
| 11G2                                                    | tgtgcctagtaactatcttacgg    |                        |
| 12G1                                                    | tggaatggccctgctagag        | AC016712               |
| 12G2                                                    | tagtaaccacagattccaactgag   |                        |
| <i>Primer pairs used to obtain hybridization probes</i> |                            |                        |
| U6for                                                   | tgctcgettcggcagc           | AL138764               |

|                                                  |                              |          |
|--------------------------------------------------|------------------------------|----------|
| U6rev                                            | aaaaatatggaacgcttcacg        |          |
| U3for                                            | ttactggccaagatactttagg       | AL391807 |
| U3rev                                            | gaaacccaattggcacaac          |          |
| 5S rRNAfor                                       | tacggccataccaccctg           | AL158069 |
| 5S rRNArev                                       | cctacagcaccgggtattc          |          |
| ALUfor                                           | tcccatttctctagacctgctg       | AF118569 |
| ALUrev                                           | cccataacaggcttcatatttcc      |          |
| L1for                                            | gattatctaataatgacctacttgcaac | AC037430 |
| L1rev                                            | ccagaagaagtatagcatgttcac     |          |
| mRNA1for                                         | ggtactgtggtatggactagagaac    | AC005410 |
| mRNA1rev                                         | tgtttccgttctcctgaactc        |          |
| mRNA2for                                         | gtgaagatattggtacttgatagcc    | AC021034 |
| mRNA2rev                                         | gccatgcatgtattgtaattct       |          |
| mRNA3for                                         | gtgtgtgttctttgtttgtttg       | AL359552 |
| mRNA3rev                                         | ctgttcttgccacaggtcttta       |          |
| mRNA4for                                         | ccacgcagtgaccaagcc           | AL591050 |
| mRNA4rev                                         | actgcgagccgatgcg             |          |
| mRNA5for                                         | agaccaccaccgccag             | AC009131 |
| mRNA5rev                                         | ggcctcctgctcctcaaag          |          |
| <b><i>Primer pairs used for RT-PCR essay</i></b> |                              |          |
| U3for                                            | ttactggccaagatactttagg       | AC005410 |
| RAMP4rev                                         | ggtactgtggtatggactagagaac    |          |
| U6for                                            | tgctcgcttcggcagc             | AC009131 |
| Keratin19rev                                     | ggcctcctgctcctcaaag          |          |
| U6for                                            | tgctcgcttcggcagc             | AL591050 |
| $\gamma$ -Actin1rev                              | ccacgcagtgaccaagcc           |          |
| U6for                                            | tgctcgcttcggcagc             | AL359552 |
| LR1rev                                           | tccatgttgcttaagagcctg        |          |
| U6for                                            | tgctcgcttcggcagc             | AC021034 |

|           |                          |          |
|-----------|--------------------------|----------|
| NCP14rev  | ggctatcaagtaccaatatctcac |          |
| U6for     | tgctcgcttcggcagc         | AL354668 |
| T41250rev | ccttagtgctagtagcagatactg |          |

<sup>a</sup> GenBank accessions of the corresponding chimeras from the Non-Redundant and High Throughout Genome Sequences databases.
